# Supplementary material
Source: Springer Nature journal article supplement (https://www.springermedizin.de/resource/supplementary/13019_2012_778_MOESM10_ESM.pdf/9639066)

**Figure 5d:**

**Sheep 3830**

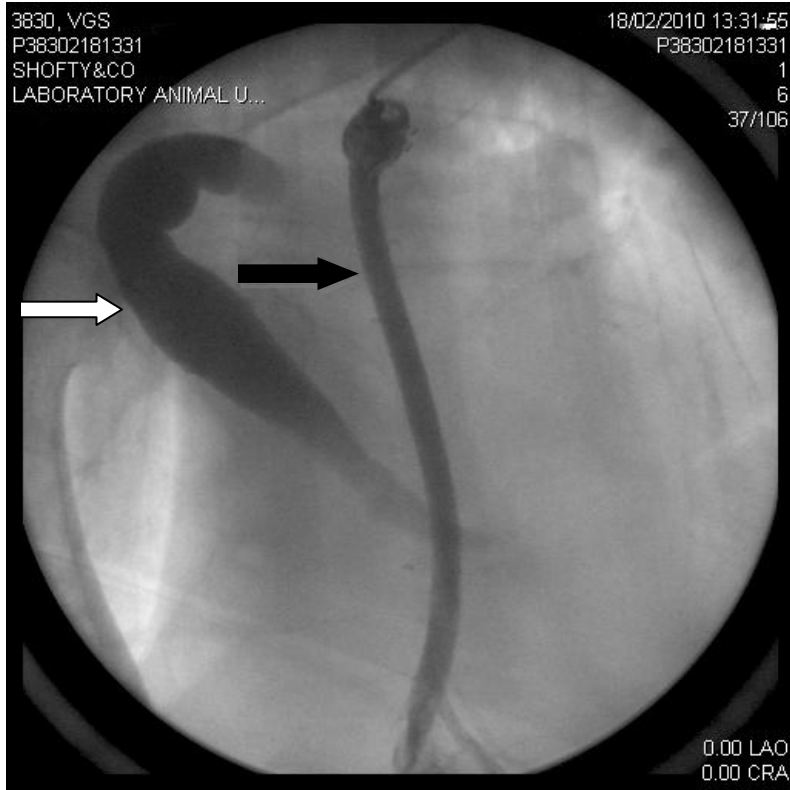

Supplement: MOESM10 [file 9639066]
